# Supplementary material for: Advanced late-onset retinitis pigmentosa with dominant-acting D477G RPE65 mutation is responsive to oral synthetic retinoid therapy
Source: PubMed Central journal article supplement — BMJ Open Ophthalmol. 2020 May 5;5(1):e000462. doi: 10.1136/bmjophth-2020-000462 (PMC7228561; doi:10.1136/bmjophth-2020-000462), 2020-05-05
Supplement: bmjophth-2020-000462supp001.pdf [file bmjophth-2020-000462supp001.pdf]

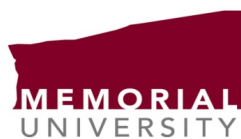**Faculty of Medicine**

*Discipline of Genetics*

*Craig L. Dobbin Genetics Research Centre*

*St. John's, NL Canada A1B 3V6*

*Tel: 709-864-6686 Fax: 709-864-8673*

[www.med.mun.ca](http://www.med.mun.ca)

Professor Peter Humphries,  
Department of Medical Genetics,  
Trinity College Dublin

Dear Peter

I am very pleased that you will include reference to the Newfoundland ADRP family with the RPE65 D477G mutation in your paper on the family from Ireland with this mutation. It is important to note the consistent phenotype in families with this mutation occurring in other countries.

Thank you,

A handwritten signature in black ink that reads "Jane S. Green".

Jane S. Green, PhD  
Honorary Research Professor, Discipline of Genetics,  
Faculty of Medicine, Memorial University,  
St. John's, NL A1B3V6, Canada  
[janeg@mun.ca](mailto:janeg@mun.ca) (1-709-864-6686)
